# Supplementary material for: Application of machine learning in the quantitative analysis of surface characteristics of highly abundant cytoplasmic proteins: Toward AI-based biomimetics
Source: Preprints.org preprint supplement (doi:10.20944/preprints202312.1187.v1), 2023-12-15
Supplement: Supplementary file 1 [file supplementary]

## Supplementary Information

# Application of machine learning in the quantitative analysis of surface characteristics of highly abundant cytoplasmic proteins: Toward AI-based biomimetics

*Joo A Moon<sup>1</sup>, Guanghao Hu<sup>1</sup>, and Tomohiro Hayashi<sup>1,2\*</sup>*

<sup>1</sup> Department of Materials Science and Engineering, School of Materials and Chemical Technology, Tokyo Institute of Technology, 4259 Nagatsuta-cho, Midori-ku, Yokohama, Kanagawa 226-8502, Japan

<sup>2</sup> The Institute for Solid State Physics, The University of Tokyo, 5-1-5, Kashiwanoha, Kashiwa, Chiba 277-0882, Japan

\*corresponding author: [tomo@mac.titech.ac.jp](mailto:tomo@mac.titech.ac.jp)

### Contents:

|                                          |     |
|------------------------------------------|-----|
| 1. Single-shot hyperparameter            | S-1 |
| 2. Statistical summary of descriptors    | S-2 |
| 3. Calculation of the surface net charge | S-3 |

**Table S1:** Hyperparameters of machine learning models in a single-shot trial

| Model | Full Name                | Hyperparameters                                                                         |
|-------|--------------------------|-----------------------------------------------------------------------------------------|
| KNN   | k-Nearest Neighbors      | {'algorithm': 'auto', 'metric': 'manhattan', 'n_neighbors': 11, 'weights': 'distance'}  |
| LR    | Logistic Regression      | {'C': 0.1, 'penalty': 'l2', 'solver': 'liblinear'}                                      |
| RF    | Random Forest            | {'max_depth': 10, 'max_features': 'sqrt', 'min_samples_split': 2, 'n_estimators': 1000} |
| SVM   | Supported Vector Machine | {'C': 1.0, 'gamma': 'scale', 'kernel': 'rbf'}                                           |

**Table S2:** Statistical summary of surface descriptors for all protein data set.

|                                                   | s_phobic_avg | s_neg_area_avg | s_pos_area_avg | norm_s_b | FD    | s_bs   | s_do    |
|---------------------------------------------------|--------------|----------------|----------------|----------|-------|--------|---------|
| <b>Extracellular Proteins</b>                     |              |                |                |          |       |        |         |
| count                                             | 331          |                |                |          |       |        |         |
| mean                                              | -1.101       | 0.137          | 0.193          | 0.231    | 2.192 | 13.009 | 52.988  |
| std                                               | 0.366        | 0.043          | 0.048          | 0.102    | 0.060 | 9.479  | 12.690  |
| min                                               | -1.998       | 0.024          | 0.061          | -0.049   | 2.066 | 0      | 7.23    |
| 25%                                               | -1.3365      | 0.1135         | 0.1635         | 0.159    | 2.144 | 5.694  | 45.2715 |
| 50%                                               | -1.148       | 0.137          | 0.19           | 0.251    | 2.190 | 11.609 | 54.704  |
| 75%                                               | -0.899       | 0.1605         | 0.221          | 0.298    | 2.235 | 19.968 | 60.874  |
| max                                               | 0.719        | 0.305          | 0.364          | 0.491    | 2.372 | 47.337 | 88.165  |
| <b>Highly Abundant Cytoplasmic (HAC) Proteins</b> |              |                |                |          |       |        |         |
| count                                             | 337          |                |                |          |       |        |         |
| mean                                              | -1.569       | 0.170          | 0.257          | 0.185    | 2.180 | 8.691  | 50.151  |
| std                                               | 0.452        | 0.076          | 0.090          | 0.098    | 0.069 | 8.643  | 16.337  |
| min                                               | -2.74        | 0.022          | 0.031          | -0.02    | 2.045 | 0      | 1       |
| 25%                                               | -1.854       | 0.112          | 0.195          | 0.126    | 2.117 | 2.578  | 39.872  |
| 50%                                               | -1.6         | 0.169          | 0.236          | 0.192    | 2.178 | 6.733  | 48.05   |
| 75%                                               | -1.385       | 0.22           | 0.309          | 0.26     | 2.232 | 12.685 | 58.326  |
| max                                               | 0.294        | 0.555          | 0.495          | 0.512    | 2.325 | 57.663 | 99.187  |

\*Full name of each descriptor:

s\_phobic\_avg: Average Surface Hydrophobicity

s\_neg\_area\_avg: Average Negatively Charged Surface Area

a\_pos\_area\_avg: Average Positively Charged Surface Area

norm\_s\_b: Average Normalized Surface b-factor

FD: Average Surface Roughness

s\_bs: Surface Beta Strands Composition

s\_do: Surface Disordered Regions Composition

**Table S3:** pKa Values used to calculate net charge<sup>1</sup>

| 1-letter code | Amino Acid    | pK <sub>a</sub> Values   |                                                   |                            |
|---------------|---------------|--------------------------|---------------------------------------------------|----------------------------|
|               |               | pK <sub>a1</sub> (-COOH) | pK <sub>a2</sub> (-NH <sub>3</sub> <sup>+</sup> ) | pK <sub>aR</sub> (R group) |
| A             | Alanine       | 2.35                     | 9.87                                              |                            |
| C             | Cysteine      | 2.05                     | 10.25                                             | 8.00                       |
| D             | Aspartic Acid | 2.10                     | 9.82                                              | 3.86                       |
| E             | Glutamic Acid | 2.10                     | 9.47                                              | 4.07                       |
| F             | Phenylalanine | 2.58                     | 9.24                                              |                            |
| G             | Glycine       | 2.35                     | 9.78                                              |                            |
| H             | Histidine     | 1.77                     | 9.18                                              | 6.10                       |
| I             | Isoleucine    | 2.32                     | 9.76                                              |                            |
| K             | Lysine        | 2.18                     | 8.95                                              | 10.53                      |
| L             | Leucine       | 2.33                     | 9.74                                              |                            |
| M             | Methionine    | 2.28                     | 9.21                                              |                            |
| N             | Asparagine    | 2.02                     | 8.80                                              |                            |
| P             | Proline       | 2.00                     | 10.60                                             |                            |
| Q             | Glutamine     | 2.17                     | 9.13                                              |                            |
| R             | Arginine      | 2.01                     | 9.04                                              | 12.48                      |
| S             | Serine        | 2.21                     | 9.15                                              |                            |
| T             | Threonine     | 2.09                     | 9.10                                              |                            |
| V             | Valine        | 2.29                     | 9.72                                              |                            |
| W             | Tryptophan    | 2.38                     | 9.39                                              |                            |
| Y             | Tyrosine      | 2.20                     | 9.11                                              | 10.07                      |

Surface net charge was calculated using Table S3 under physiological conditions (pH=7). General expressions derived from Henderson-Hasselbalch equation calculated negative (Q<sup>-</sup>) and positive (Q<sup>+</sup>) charge as follows<sup>2</sup>:

$$Q^{-} = \frac{-1}{1 + 10^{-(pH-pKa)}}$$

$$Q^{+} = \frac{1}{1 + 10^{+(pH-pKa)}}$$

Thus, surface net charge of protein was calculated for all the surface residues with the following general expression:

$$Q_{protein} = \sum Q^{-} + \sum Q^{+}$$

Where Q includes C-terminus and negatively charged R groups, and Q<sup>+</sup> includes N-terminus and positively charged R groups.

#### Reference:

(1) Miclotte, G.; Martens, K.; Fostier, J. Computational assessment of the feasibility of protonation-based protein sequencing. *PLoS One* **2020**, *15* (9), e0238625. DOI: 10.1371/journal.pone.0238625.

(2) Moore, D. S. Amino acid and peptide net charges: A simple calculational procedure.

*Biochemical Education* **1985**, *13* (1), 10-11. DOI: [https://doi.org/10.1016/0307-4412\(85\)90114-1](https://doi.org/10.1016/0307-4412(85)90114-1).
